# Supplementary material for: Chenodeoxycholic acid activates NLRP3 inflammasome and contributes to cholestatic liver fibrosis
Source: PubMed Central journal article supplement (PMC5356637; doi:10.18632/oncotarget.13796), 2016-12-04
Supplement: oncotarget-07-83951-s001.pdf [file oncotarget-07-83951-s001.pdf]

# Chenodeoxycholic acid activates NLRP3 inflammasome and contributes to cholestatic liver fibrosis

## Supplementary Material

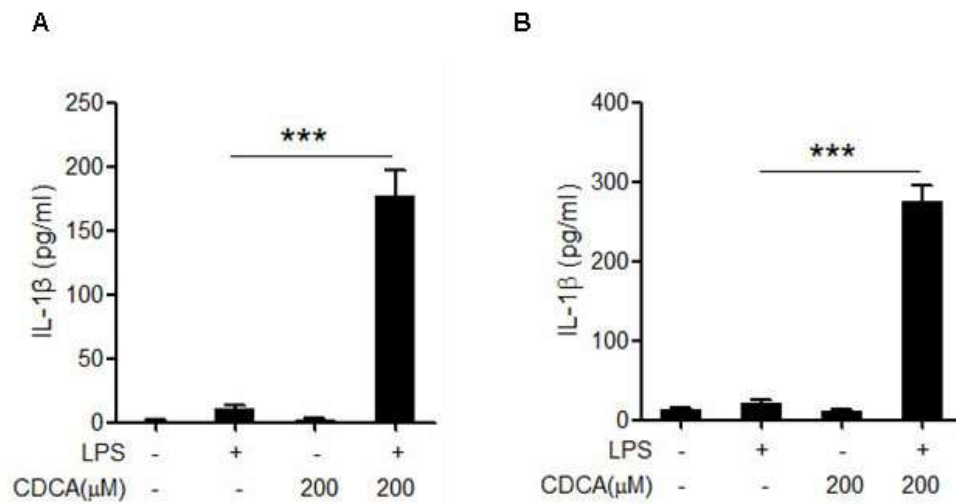

**Supplementary Figure 1: CDCA induces the production of mature IL-1 $\beta$  in LPS-primed macrophages.** (A) J774A.1 macrophages were exposed to CDCA (200 $\mu$ M) for 24h with or without LPS pre-treatment. Secreted IL-1 $\beta$  was then analyzed by ELISA. (B) Kupffer cells were exposed to CDCA (200 $\mu$ M) for 24h with or without LPS pre-treatment. Secreted IL-1 $\beta$  was analyzed by ELISA. \*\*\*:  $p < 0.001$ .

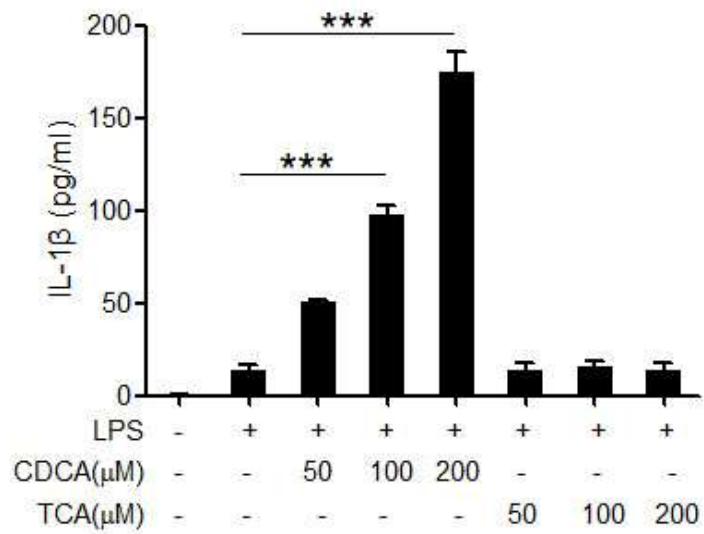

**Supplementary Figure 2: The effect of TCA on the induction of IL-1 $\beta$  secretion.** LPS-primed J774A.1 macrophages were incubated with various doses of CDCA or TCA for 24h. Secreted IL-1 $\beta$  was analyzed by ELISA. \*\*\*:  $p < 0.001$ .
